# Supplementary material for: Identification of Genes Involved in Resistance to High Exogenous 20-Hydroxyecdysone in Spodoptera litura
Source: MDPI journal article supplement (doi:10.3390/insects13030297), 2022-03-17
Supplement: s1 [file s1]

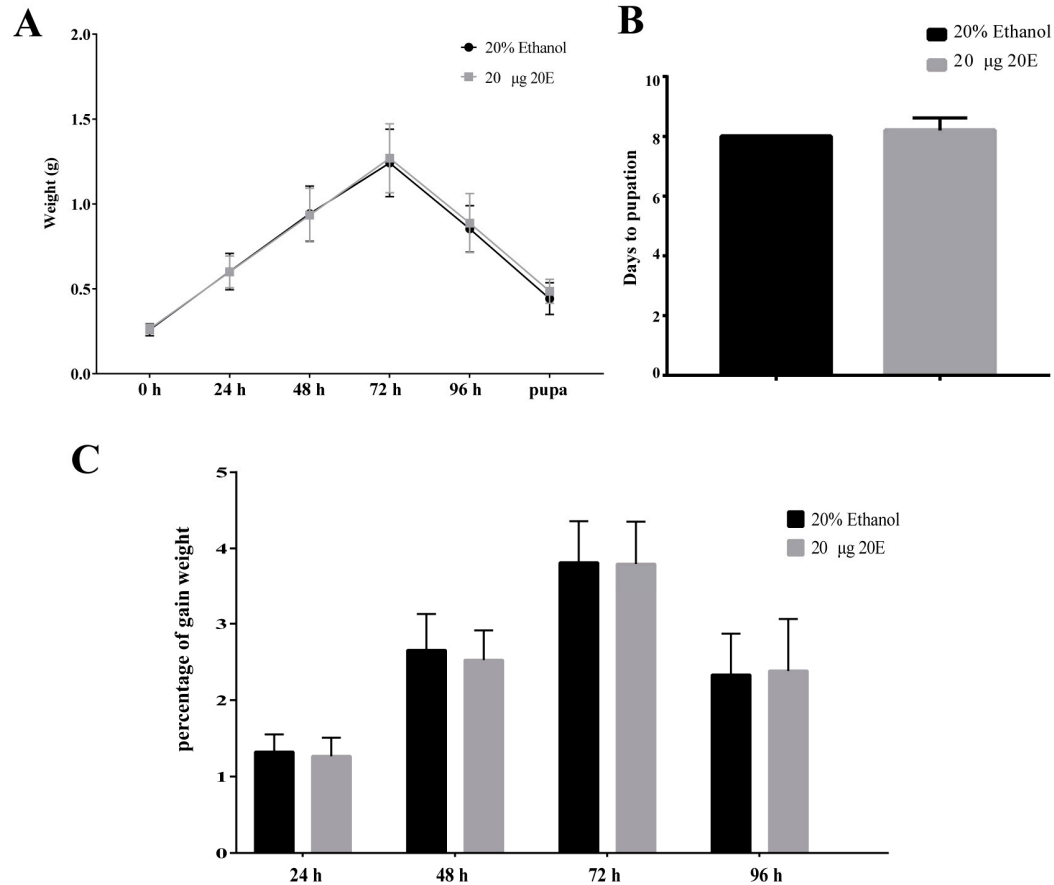

Figure S1. Effects of the ingested 20E (10 µg/larva and 50 µg/larva) on the growth and development of the *S. litura* larvae. (A) The average weight of the larvae treated with 20E or 20% ethanol. (B) The time to pupation of the larvae after 20E or 20% ethanol treatment. (C) Percentage of the gain weight of the larvae treated with 20E or 20% ethanol.

Table S1 qPCR primers

| Gene name      | Gene ID        | Forward primer           | Reverse primer             |
|----------------|----------------|--------------------------|----------------------------|
| D-ARY          | XM_022966958.1 | TGGCAAGGACTATGACAT       | TACAGCAGCAAGAACTCT         |
| D-FAC          | XM_022973512.1 | CCTCAATGTGCTCGTTAA       | AACAATAGACAAGTGATTCCT      |
| D-GLO          | XM_022981636.1 | ACCTTGTGAGAATAACTACCTAGC | AAGCAGCGAAGCAGAGAA         |
| D-HE           | XM_022963349.1 | CTAAGGATGGAGAGTTGAC      | GCAGTAGAACATAGTGACAT       |
| CYP            | XM_022964033.1 | GAGAAGATATTCCAGGTT       | GAGATATGCTTCAGGTAA         |
| HR3            | XM_022961202.1 | TGAAACTGACGCAAGATG       | CGTACAATACTTGGTCACGGTTCAC  |
| ECK            | XM_022967830.1 | AATTAGAGCAGTCGGTAA       | CTATCCAGTCGTAGTAGTAA       |
| EO             | XM_022975357.1 | GTGTATTGTGGTAGTAAC       | GAATAATAGGAAGATTGAATG      |
| HR4            | XM_022965367.1 | GTCAACATCACAGCATTAG      | TAGTTCAGGAGAGTTAGGT        |
| U-LUC          | XM_022976208.1 | TCAATAAGTATAAGCCAGTATCAA | AGCAGGAGAAGTCACATT         |
| E75            | XM_022963581.1 | GCTGAAACGCACCGACATCATCAA | GACTTCTTGGACAGGTTACAGGGGCG |
| FTZ            | XM_022976556.1 | GCGACCAAACCGACACTA       | CGTTAGCAGCCCGTAGTG         |
| ECR            | XM_022963764.1 | AGTAGCTCGGCGGTATGA       | CTGCCTTGCGGTAGTTGT         |
| Reference gene | HQ012003.2     | GGTGCCACGACAGAACAT       | GCAACAGGAACACGGAAA         |
